# Supplementary material
Source: PubMed Central journal article supplement (PMC7657643)
Supplement: AEM.01861-20-s0001.pdf [file AEM.01861-20-s0001.pdf]

# Spatiotemporal Distribution of the Environmental Microbiota in Food Processing Plants as Impacted by Cleaning and Sanitizing Procedures: The Case of Slaughterhouses and Gaseous Ozone

Cristian Botta, Ilario Ferrocino, Alessandro Pessione, Luca Cocolin, Kalliopi Rantsiou

## Supplementary material

**Fig. S1.** Venn diagram showing the distribution of oligotypes from core OTUs in the four environments (A-DR, A-PR, B-PR, C-DR) and three surface categories (S1, S2, S3).

**Fig. S2.** Significant pairwise comparison ( $Rho > 0.6$ ; false-discovery rate [FDR],  $P < 0.001$ ) between oligotype of the same species and different species expressed as absolute number **(a)** and relative percentage **(b)**.

**Table S1.** Variance in biological dissimilarity among bacterial communities explained by each categorical variable (plants, environment, room types, surface categories, temporal phases) or their interactions. Variance explained ( $R^2$ ) and statistical significance ( $P$ -value) quantified with a PERMANOVA test of Bray–Curtis dissimilarity; since  $P$ -values result from a 999 permutations test, they are only reported down to 0.001.

**Table S2.** Table displaying the OTUs subjected to oligotyping and parameters used for the analysis.

Fig. S1

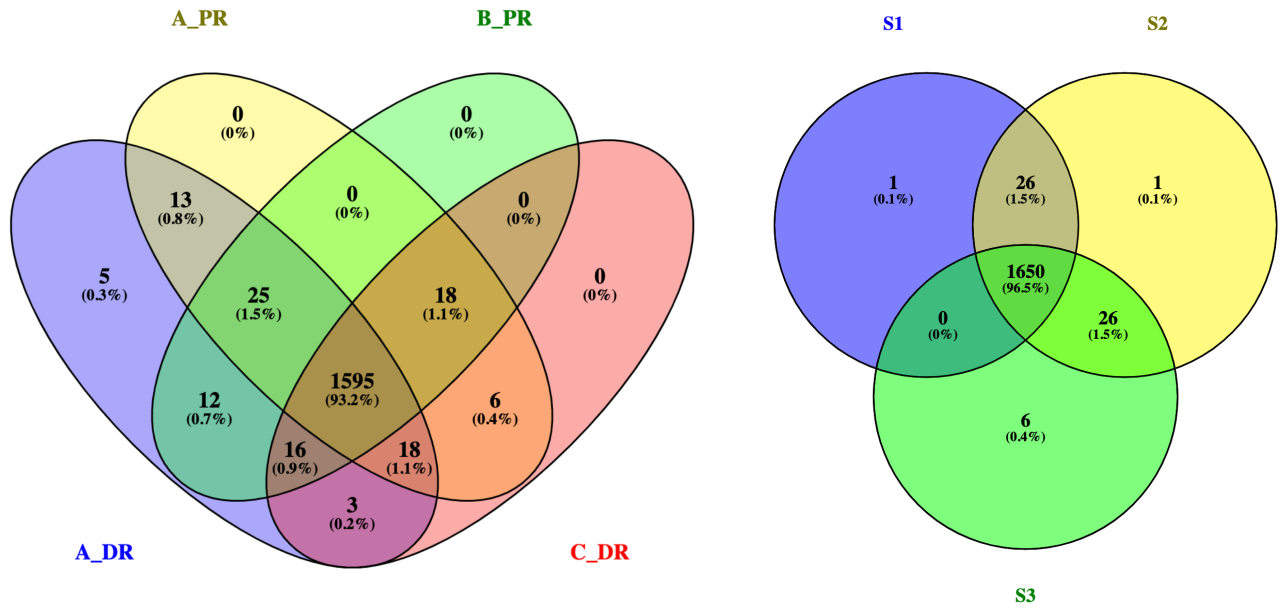

Fig. S2

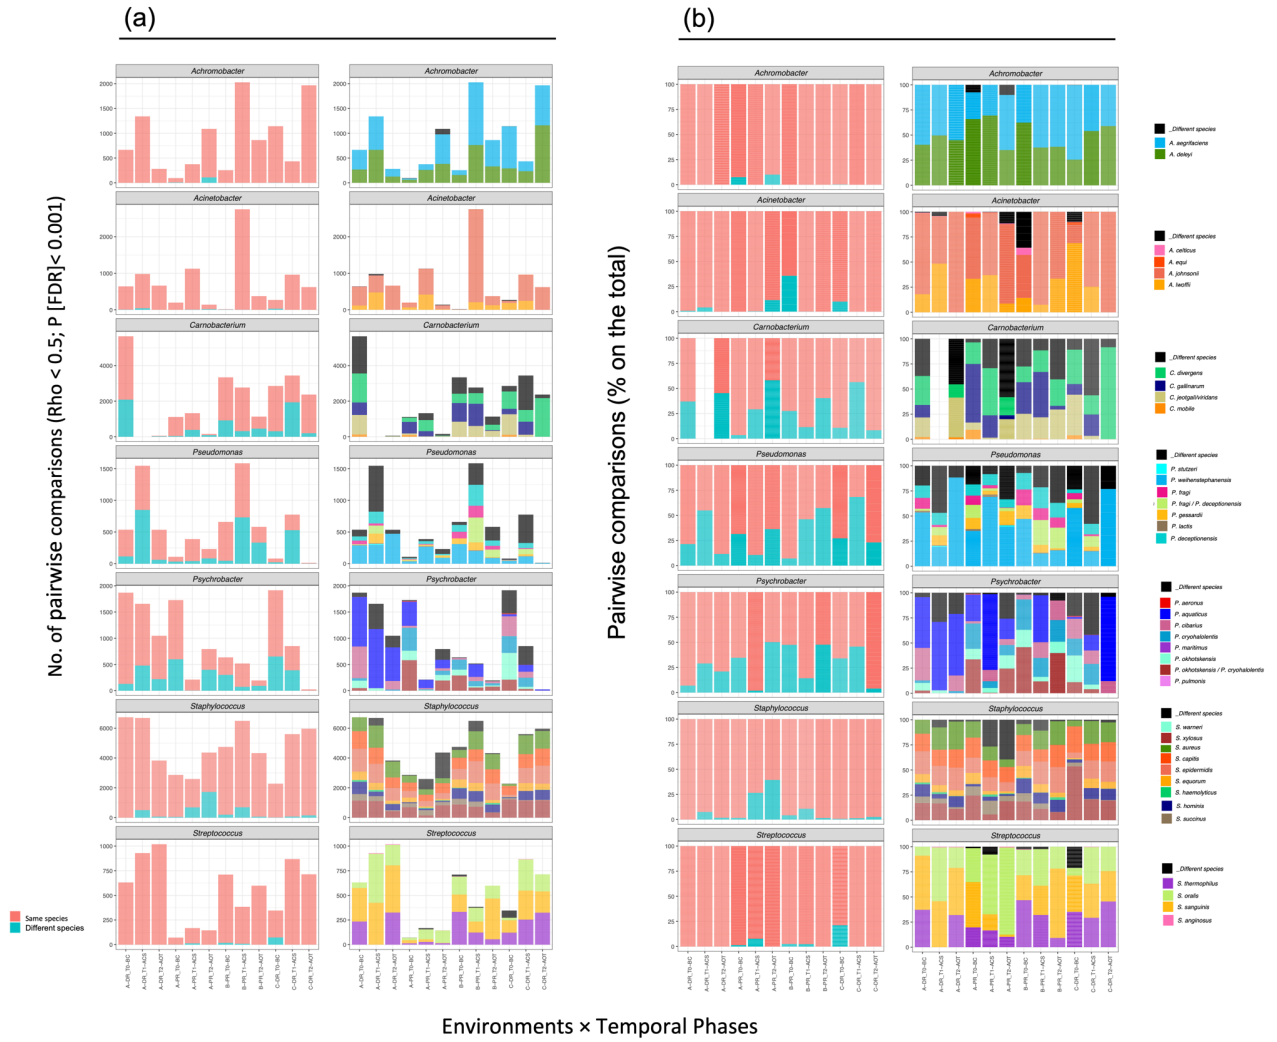

Table S1

|             | <b>Explanatory variable</b>                   | <b>R<sup>2</sup></b> | <b>P - value</b> |
|-------------|-----------------------------------------------|----------------------|------------------|
| Single      | Phase ( <i>BC, ACS, AOT</i> )                 | 0.055                | 0.001 *          |
|             | Environment ( <i>A-DR, A-PR, B-PR, C-DR</i> ) | 0.052                | 0.001 *          |
|             | Plant ( <i>A, B, C</i> )                      | 0.029                | 0.001 *          |
|             | Room type ( <i>PR, DR</i> )                   | 0.023                | 0.001 *          |
|             | Surface category ( <i>S1, S2, S3</i> )        | 0.006                | 0.790            |
| Interaction | Environment × Phase                           | 0.068                | 0.001 *          |
|             | Plant × Phase                                 | 0.047                | 0.001 *          |
|             | Environment × Surface category × Phase        | 0.022                | 0.985            |
|             | Room type × Phase                             | 0.021                | 0.001            |
|             | Surface category × Phase                      | 0.018                | 0.135            |
|             | Plant × Surface category                      | 0.017                | 0.984            |
|             | Environment × Surface category                | 0.014                | 0.580            |
|             | Plant × Surface category × Phase              | 0.010                | 0.768            |
|             | Room type × Surface category × Phase          | 0.006                | 0.749            |
|             | Room type × Surface category                  | 0.005                | 0.144            |

Table S2

| <b>OTUs ID</b> | <b>Shannon's entropy (mean)</b> | <b>Reads analysed</b> | <b>High entropy positions chosen (-C option)</b>                                                                                                                                                                                                                                                                                                                                                                                                                                                                                                | <b>Min total abundance of oligotype in all samples (-A option)</b> | <b>Min substantive abundance (-M option)</b> | <b>% of reads represented</b> | <b>Purity score</b> |
|----------------|---------------------------------|-----------------------|-------------------------------------------------------------------------------------------------------------------------------------------------------------------------------------------------------------------------------------------------------------------------------------------------------------------------------------------------------------------------------------------------------------------------------------------------------------------------------------------------------------------------------------------------|--------------------------------------------------------------------|----------------------------------------------|-------------------------------|---------------------|
| denovo307699   | 0.173                           | 423096                | 8, 457, 458, 308, 12, 275, 407, 304, 299, 333, 269, 320, 9, 250, 463, 462, 464, 101, 461, 460, 459, 298, 422, 368, 417, 419, 303, 282, 341, 285, 197, 437                                                                                                                                                                                                                                                                                                                                                                                       | default                                                            | 50                                           | 68.15                         | 0.88                |
| denovo443152   | 0.300                           | 297574                | 8, 458, 459, 252, 132, 40, 118, 119, 131, 415, 130, 307, 246, 120, 274, 308, 250, 309, 136, 251, 117, 12, 260, 43, 38, 206, 261, 286                                                                                                                                                                                                                                                                                                                                                                                                            | 400                                                                | 50                                           | 35.56                         | 0.79                |
| denovo84598    | 0.140                           | 542146                | 8, 12, 251, 317, 348, 457, 458                                                                                                                                                                                                                                                                                                                                                                                                                                                                                                                  | 0                                                                  | 50                                           | 92.92                         | 0.82                |
| denovo440404   | 0.178                           | 2823655               | 7, 8, 9, 12, 456, 457, 458                                                                                                                                                                                                                                                                                                                                                                                                                                                                                                                      | 500                                                                | 50                                           | 90.80                         | 0.98                |
| denovo191751   | 0.102                           | 536725                | 8, 12, 29, 50, 57, 104, 130, 138, 148, 250, 251, 306, 307, 308, 341, 367, 393, 422, 457, 458                                                                                                                                                                                                                                                                                                                                                                                                                                                    | 0                                                                  | 50                                           | 89.44                         | 0.92                |
| denovo629236   | 0.178                           | 936940                | 8, 9, 12, 125, 246, 250, 251, 267, 382, 426, 437, 438, 440, 441, 442, 443, 444                                                                                                                                                                                                                                                                                                                                                                                                                                                                  | default                                                            | 50                                           | 75.15                         | 0.81                |
| denovo245059   | 0.251                           | 306701                | 8, 9, 12, 121, 129, 132, 133, 136, 137, 250, 260, 296, 305, 307, 329, 395, 405, 457, 458                                                                                                                                                                                                                                                                                                                                                                                                                                                        | 400                                                                | 50                                           | 44.27                         | 0.87                |
| denovo210339   | 0.231                           | 205409                | 8, 12, 29, 31, 50, 55, 57, 59, 70, 94, 101, 103, 104, 113, 119, 120, 122, 129, 130, 139, 143, 163, 178, 209, 234, 237, 250, 251, 252, 258, 259, 262, 268, 273, 274, 275, 279, 287, 292, 306, 307, 308, 309, 328, 330, 336, 340, 341, 345, 355, 356, 358, 364, 368, 370, 371, 377, 379, 380, 382, 391, 393, 394, 395, 397, 400, 402, 403, 404, 405, 406, 408, 409, 410, 412, 414, 416, 418, 420, 421, 422, 423, 427, 428, 429, 430, 431, 435, 436, 437, 438, 441, 442, 443, 444, 445, 446, 447, 450, 451, 453, 456, 457, 458, 460, 461, 463, 464 | default                                                            | 50                                           | 58.85                         | 0.73                |
| denovo294860   | 0.193                           | 2195523               | 8, 12, 37, 71, 77, 78, 84, 114, 116, 129, 135, 251, 257, 259, 273, 274, 279, 285, 292, 306, 317, 318, 341, 360, 368, 393, 402, 406, 417, 419, 421, 422, 424, 430, 436, 437, 438, 443, 446, 451, 453, 457, 458, 459, 460, 461, 462, 463, 464                                                                                                                                                                                                                                                                                                     | 200                                                                | 100                                          | 66.61                         | 0.82                |
| denovo518842   | 0.167                           | 1621076               | 3, 8, 18, 22, 29, 33, 43, 49, 57, 70, 71, 76, 80, 104, 105, 119, 122, 139, 140, 153, 163, 189, 210, 221, 223, 237, 250, 251, 263, 266, 268, 276, 294, 300, 302, 306, 307, 308, 318, 339, 341, 345, 370, 374, 393, 396, 400, 410, 439, 451, 457, 458, 460, 461, 463                                                                                                                                                                                                                                                                              | default                                                            | 50                                           | 81.67                         | 0.27                |
